# Supplementary material for: Structure and function of a glycoside hydrolase family 8 endoxylanase from Teredinibacter turnerae
Source: PubMed Central journal article supplement (PMC6173055; doi:10.1107/s2059798318009737), 2018-10-02
Supplement: d-74-00946-sup1.pdf [file d-74-00946-sup1.pdf]

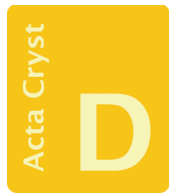

STRUCTURAL  
BIOLOGY

**Volume 74 (2018)**

**Supporting information for article:**

**Structure and function of a GH8 endoxylanase from *Teredinibacter turnerae***

**Claire A. Fowler, Glyn R. Hemsworth, Fiona Cuskin, Sam Hart, Johan Turkenburg, Harry Gilbert, Paul H. Walton and Gideon J. Davies**

**Table S1** TtGH8 (CAZy reference TERTU\_4506) DNA catalytic domain sequence involving residues 41-436.

---

GCTGGTGCCGTTGCTACCGGCGAGTACCGCAATCTGTTTGCCGAAATCGGAAAAAGCGAAATAGACATCC  
 AGCGCAAATTGACGAGGCGTTTCAGCACTTGTTTTATGGCGACGCGAAAGATGCAGCTGTCTACTATCA  
 AGCGGGTGGAAACGAGAATGGTCCACTCGCATATGTTTACGATGTGAACAGCAATGACGTGCGCTCAGA  
 AGGCATGAGCTACGGCATGATGATTACTGTTCAAATGGACAAAAAGCCGAGTTCGATGCAATCTGGAA  
 CTGGGCGAAAACCTATATGTATCAAGACTCCCCACGCATCCAGCGTTTGGTTACTTTGCCTGGTCCATGC  
 GCCGCGATGGTGTGCGCAATGACGATATGCCAGCGCCAGATGGCGAGGAATATTTTCGTGACCGCTCTCTA  
 TTTCGCCGCCGCTGGGGTAATGGCGAAGGTATTTTCAACTACCAACAGGAAGCGGACACCATTTTG  
 AGCCGCATGCGCCACCGCCAGGTGATCACCGGCCAACCAATCGCGGAGTAATGACTGCGACCAATCTG  
 TTCCACCCGGAAGAGGCGCAAGTGCCTCACGCCGACATCAATAATGCTGATCATAACAGACGCGTCTT  
 ACCATCTGCCCTCGTTCTATGAAATTTGGGCACGTGTCGCGCCGCAAGAAGATCGCGCGTTTTGGGCCAA  
 AGCGGCCGATGTGAGCCGCGACTATTTGCCAAAGCCGCCACCCTGTCACTGCGTTAACACCGGACTAC  
 GGTAATTTTGATGGCACCCCGTGGGCGGCATCTGGCGGCCGGAGTCGGTAGATTTTCGATACGATGCCT  
 GCGTTCGTCATGAACCTGGTCCATGGACTATGCCTGGTGGGGCAAAGATTACGGCGCACCCGCGCGCA  
 GTGATAAATTACTCGCGTTCTTCGAAACCCAGGAAGGCAAAATGAACCACCTCTATAGCCTGGATGGCAA  
 ACCGTGGGTGGTGGACCGACCCTCGGCCTAATTTCCATGAATGCAACGGCAGCTATGGCAGCTACTGAT  
 CCCCCTGGCACAATTTGTGGAAAAGCTCTGGCAACAACAACCCCCACAGGGCAATACCGGTACTAC  
 GACGGTGTCTATACCTGATGGCGCTGCTACATTGCGCTGGGGAGTACAAAGCGTGGATCCCCGACGGGG  
 AATAA

---

**Table S2** TtGH8 macromolecule production information. The TtGH8 catalytic domain was identified and a construct produced without the associated host periplasmic leader sequence and linker section. A hexahistidine tag and 3C protease cleavage site was built into the construct (flanked by NcoI and XhoI restriction sites) produced by GenScript, which was codon optimised for use in *E.coli*.

|                              |                                                                                                                                                                                                                                                                                                                                                                                                                                                                             |
|------------------------------|-----------------------------------------------------------------------------------------------------------------------------------------------------------------------------------------------------------------------------------------------------------------------------------------------------------------------------------------------------------------------------------------------------------------------------------------------------------------------------|
| Source organism              | <i>Teredinibacter turnerae</i>                                                                                                                                                                                                                                                                                                                                                                                                                                              |
| DNA source                   | Optimised sequence obtained from GenScript                                                                                                                                                                                                                                                                                                                                                                                                                                  |
| Forward primer               | NcoI                                                                                                                                                                                                                                                                                                                                                                                                                                                                        |
| Reverse primer               | XhoI                                                                                                                                                                                                                                                                                                                                                                                                                                                                        |
| Cloning vector               | One Shot Top10                                                                                                                                                                                                                                                                                                                                                                                                                                                              |
| Expression vector            | pET-28a                                                                                                                                                                                                                                                                                                                                                                                                                                                                     |
| Expression host              | <i>E.coli</i> BL21 (DE3)                                                                                                                                                                                                                                                                                                                                                                                                                                                    |
| Codon Optimised DNA Sequence | ATGGGCAGCAGCCATCATCATCATCACAGCAGCGG<br>CCTGGAAGTTCTGTTCCAGGGACCAGCAGCGGGTGCGG<br>TGGCGACCGGTGAATACCGTAACCTGTTCCGCGGAGATTG<br>GCAAGAGCGAAATCGACATTCAACGTAATAATCGATGAA<br>GCGTTCAGCACCTGTTTTATGGCGACGCGAAGGATGCG<br>GCGGTTTACTATCAAGCGGGTGGCAACGAGAACGGTCC<br>GCTGGCGTACGTGTATGACGTTAACAGCAACGATGTGC<br>GTAGCGAGGGTATGAGCTACGGCATGATGATTACCGTTC<br>AAATGGACAAGAAAGCGGAATTTGATGCGATCTGGAAC<br>TGGGCGAAAACCTACATGTATCAAGACAGCCCCACCCA<br>CCCGCGTTCGGTTATTTTTCGTGGAGCATGCGTCTGTA |

---

---

TGGTGTGGCGAACGATGATATGCCGGCGCCGGATGGCG  
AGGAATACTTCGTTACCGCGCTGTATTTTGGCGGCGGCGC  
GTTGGGGTAACGGCGAGGGTATCTTCAACTACCAGCAA  
GAAGCGGATAACCATTCTGAGCCGTATGCGTCACCGTCAA  
GTGATCACCGGTCCGACCAACCGTGGCGTTATGACCGCG  
ACCAACCTGTTCCACCCGGAGGAAGCGCAAGTGCCTTTT  
ACCCCGGACATTAACAACGCGGACCACACCGATGCGAG  
CTACCACCTGCCGAGCTTTTATGAGATCTGGGCGCGTGT  
TGCGCCGCAGGAAGATCGTGCGTTTTTGGGCGAAGGCGG  
CGGATGTGAGCCGTGATTACTTTGCGAAGGCGGCGCAC  
CCGTTACCGCGCTGACCCCGGACTATGGTAACTTCGATG  
GTACCCCGTGGGCGGCGAGCTGGCGTCCGGAGAGCGTG  
GACTTTCGTTACGATGCGTGGCGTAGCGTTATGAACTGG  
AGCATGGACTATGCGTGGTGGGGTAAAGATAGCGGTGC  
GCCGGCGCGTAGCGACAAACTGCTGGCGTTCCTTTGAGAC  
CCAAGAAGGTAAAATGAACCACCTGTACAGCCTGGACG  
GTAAGCCGCTGGGTGGCGGTCCGACCCTGGGTCTGATTA  
GCATGAACGCGACCGCGCGATGGCGGCGACCGACCCG  
CGTTGGCACAACCTTCGTGGAAAAGCTGTGGCAGCAACA  
GCCGCCGACCGGCCAGTACCGTTACTATGACGGCGTTCT  
GTATCTGATGGCGCTGCTGCACTGCGCGGGCGAGTACA  
AAGCGTGGATCCCGGATGGCGAATAACTCGAG

Complete amino acid sequence of the construct  
produced

M G S S H H H H H S S G L E V L F Q G P A A G A V A T G  
E Y R N L F A E I G K S E I D I Q R K I D E A F Q H L F Y G  
D A K D A A V Y Y Q A G G N E N G P L A Y V Y D V N S N  
D V R S E G M S Y G M M I T V Q M D K K A E F D A I W N  
W A K T Y M Y Q D S P T H P A F G Y F A W S M R R D G V  
A N D D M P A P D G E E Y F V T A L Y F A A R W G N G  
E G I F N Y Q Q E A D T I L S R M R H R Q V I T G P T N R G  
V M T A T N L F H P E E A Q V R F T P D I N N A D H T D A  
S Y H L P S F Y E I W A R V A P Q E D R A F W A K A A D V  
S R D Y F A K A A H P V T A L T P D Y G N F D G T P W A A  
S W R P E S V D F R Y D A W R S V M N W S M D Y A W W  
G K D S G A P A R S D K L L A F F E T Q E G K M N H L Y S  
L D G K P L G G G P T L G L I S M N A T A M A A T D P R  
W H N F V E K L W Q Q P P T G Q Y R Y Y D G V L Y L M  
A L L H C A G E Y K A W I P D G E Stop L E

---

**Table S3** TtGH8 mutant macromolecule production information. Primers for point mutation were designed for the TtGH8 construct and implemented using NEB Q5 site mutagenesis kit.

|                                                        |                                                                                                                                                                                                                                                                                                                                                                                                                                                                                                                                                                                                                                                                                                                            |
|--------------------------------------------------------|----------------------------------------------------------------------------------------------------------------------------------------------------------------------------------------------------------------------------------------------------------------------------------------------------------------------------------------------------------------------------------------------------------------------------------------------------------------------------------------------------------------------------------------------------------------------------------------------------------------------------------------------------------------------------------------------------------------------------|
| Source organism                                        | <i>Teredinibacter turnerae</i>                                                                                                                                                                                                                                                                                                                                                                                                                                                                                                                                                                                                                                                                                             |
| DNA source                                             | TtGH8 Optimised sequence obtained from GenScript                                                                                                                                                                                                                                                                                                                                                                                                                                                                                                                                                                                                                                                                           |
| Forward primer                                         | CTTTCGTTACAACGCGTG<br>GCGTAGCG (Asp 281- Asn)                                                                                                                                                                                                                                                                                                                                                                                                                                                                                                                                                                                                                                                                              |
| Reverse primer                                         | TCCACGCTCTCCGGACG<br>C (Asp 281- Asn)                                                                                                                                                                                                                                                                                                                                                                                                                                                                                                                                                                                                                                                                                      |
| Cloning vector                                         | One Shot Top10                                                                                                                                                                                                                                                                                                                                                                                                                                                                                                                                                                                                                                                                                                             |
| Expression vector                                      | pET-28a                                                                                                                                                                                                                                                                                                                                                                                                                                                                                                                                                                                                                                                                                                                    |
| Expression host                                        | <i>E.coli</i> BL21 (DE3)                                                                                                                                                                                                                                                                                                                                                                                                                                                                                                                                                                                                                                                                                                   |
| Complete amino acid sequence of the construct produced | <p>           MGSSHHHHHSSGLEVLFFQGPAAGAV<br/>           ATGEYRNLF AEIGKSEIDIQRKIDEAFQ<br/>           HLFYGD AKDAAVYYQAGGNENGLAY<br/>           VYDVNSNDVRSEGMSYGM MITVQMDK<br/>           KAEFDAIWNWAKTYMYQDSPTHPAFG<br/>           YFAWSMRRDGVANDDMPAPDGEEYFV<br/>           TALYFAAARWGN GEGIFNYQQEADTIL<br/>           SRMRHRQVITGPTNRGVMTATNLFHPE<br/>           EAQVRFTP DINNADHTDASYHLPSFYEI<br/>           WARVAPQEDRAFWAKAADVSRDYFAK<br/>           AAHPVTALTPDYGNFDGTPWAASWRP<br/>           ESVDFRYN AWR SVMNWSMDYAWWGK<br/>           DSGAPARSDKLLAFFETQEGKMNHLYS<br/>           LDGKPLGGGPTLGLISMNATAAMAATD<br/>           PRWHNFVEKLWQQQPPTGQYRYDGV<br/>           LYLMALLHCAGEYKAWIPDGE Stop LE         </p> |

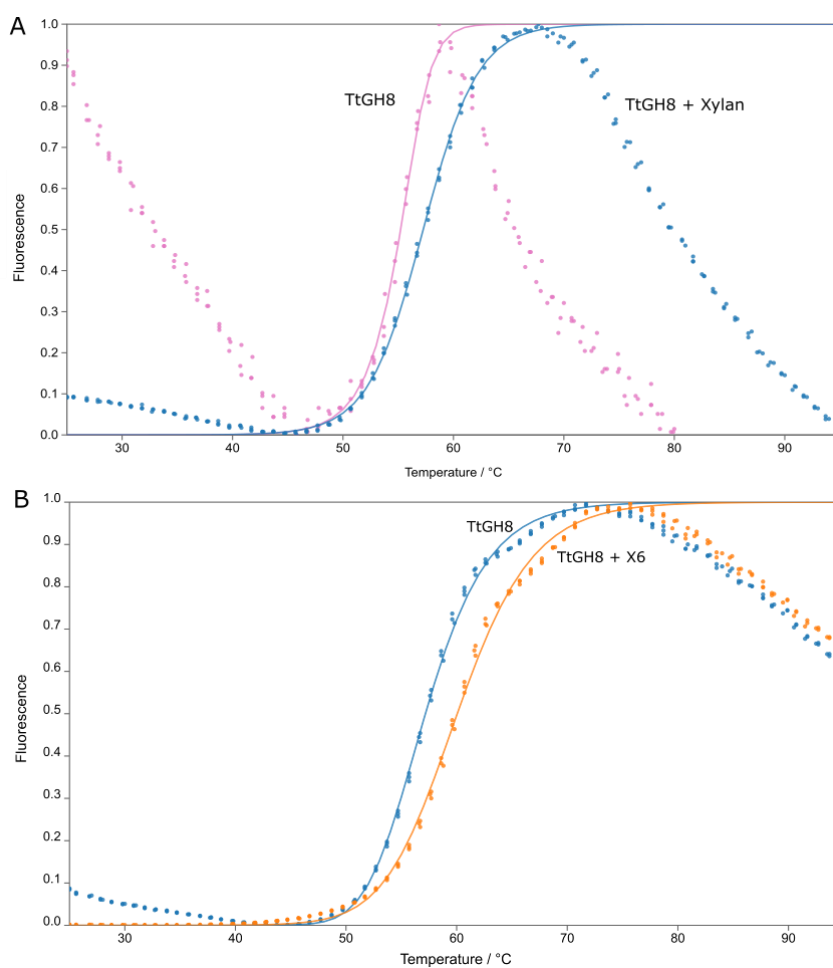

**Figure S1** Thermal shift analysis of apo TtGH8 (22 μM) and incubation with A) birchwood xylan (1 mg/ml) and B) xylohexose (X6, 10 mM) in the presence of SYPRO orange. Fluorescence (shown as normalised values) indicates interaction of the SYPRO orange dye with aromatic residues commonly found within a protein structure. Increasing fluorescence as temperature increases models the denaturation of the protein. Analysis of the protein melting curves was completed using the JTSA online tool developed by Paul Bond, available at URL <http://paulsbond.co.uk/jtsa/#/input>. Addition of xylan and xylohexaose (X6) shifted the melting temperature of the apo protein from 55.2 -57.3 °C and 57.2 - 60.1 °C respectively. In general, a significant shift in temperature is deemed to be at least 1 °C and would indicate an interaction of the protein with the substrate. A positive shift in melting temperature of 2.1 °C due to xylan incubation and 2.9 °C with xylohexaose is indicative of TtGH8 activity/binding.

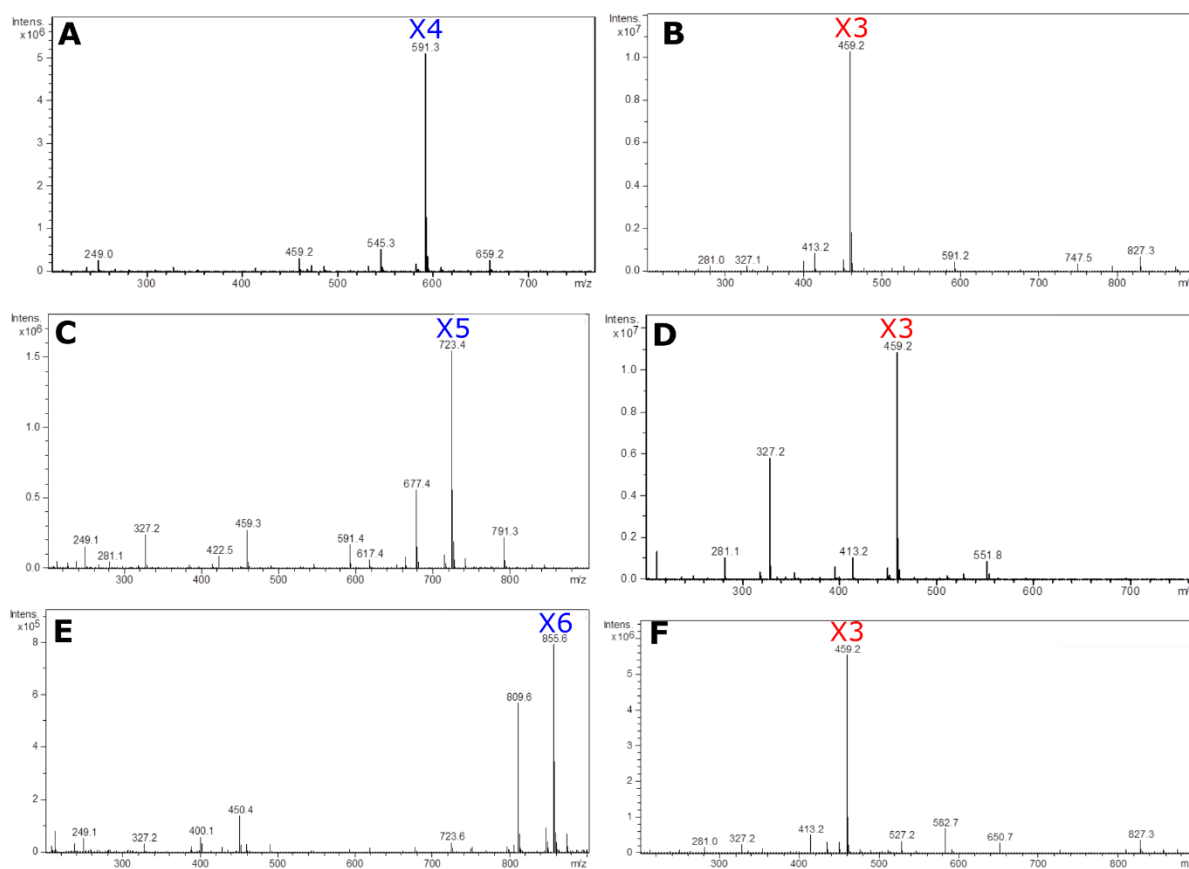

**Figure S2** LCMS results of TtGH8 against larger xylooligosaccharides. A) Xylotetraose (591.3 m/z, formic acid adduct) B) Reaction products of TtGH8 and xylotetraose, producing xylotriose (459.2 m/z formic acid adduct). Xylose is not seen due to detection limits of the equipment. C) Xylopentaose (723.4 m/z formic acid adduct) D) Reaction products of TtGH8 and xylopentaose, producing xylotriose (459.2 m/z formic acid adduct) and xylobiose (327.2 m/z formic acid adduct). E) Xylohexaose (855.6 m/z formic acid adduct) F) Reaction products of TtGH8 and xylohexaose, producing only xylotriose (459.2 m/z formic acid adduct).

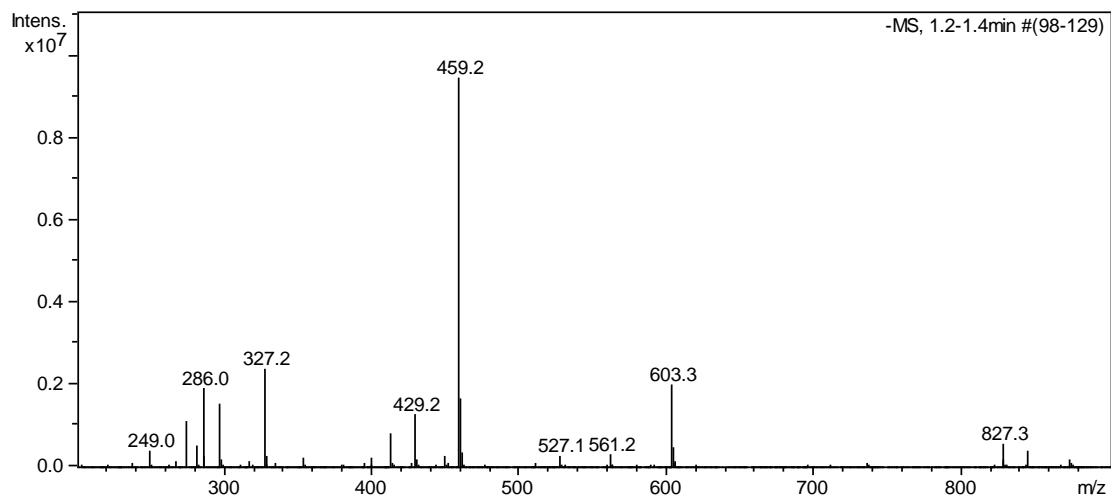

**Figure S3** Liquid chromatography mass spectrum (LCMS-Dionex system) of soluble reaction products (run on a Cosmosil Sugar-D HPLC column) generated after incubation of TtGH8 (1  $\mu$ M) with birchwood xylan (1 mg/ml) for 18 hr at 37  $^{\circ}$ C. Xylotriose and xylobiose are observed as formic acid adducts at 327.2 and 459.2 m/z respectively.

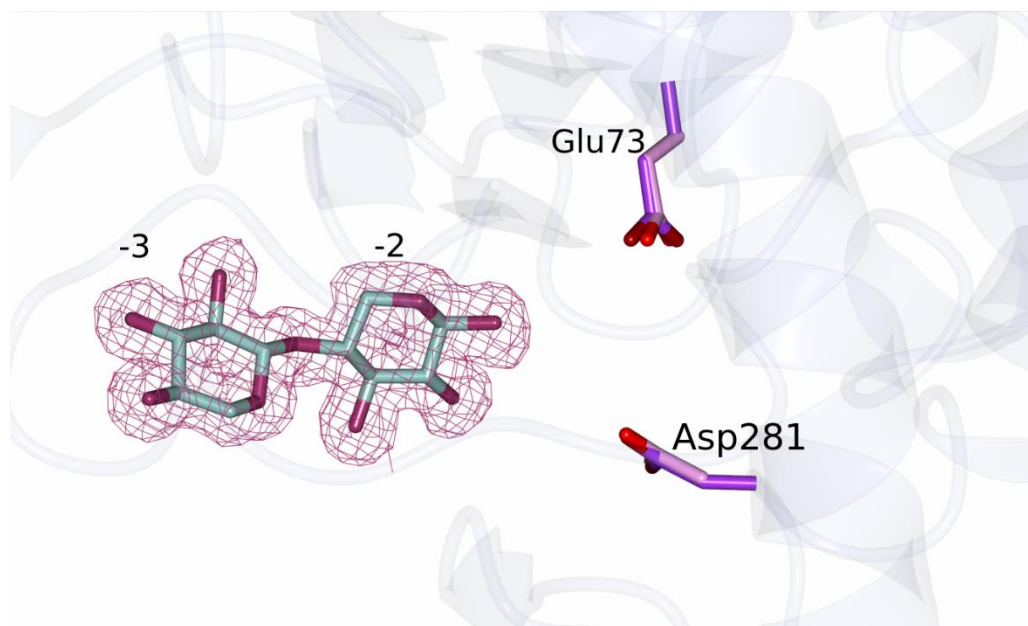

**Figure S4** TiGH8 xylobiose complex, showing xylobiose bound in sites -3 to -2, with the corresponding maximum likelihood weighted  $F_o-F_c$  “difference” electron density, calculated *prior* to any incorporation of ligands in refinement, at contour level of 0.35 electrons /  $\text{\AA}^3$  (approx.  $2.5\sigma$ ). The catalytic residues in the xylobiose complex and the unliganded enzyme are shown in purple and light-pink, respectively.
